# Supplementary material
Source: PubMed Central journal article supplement (PMC6457473)

# August 2007 Kasekela Outbreak

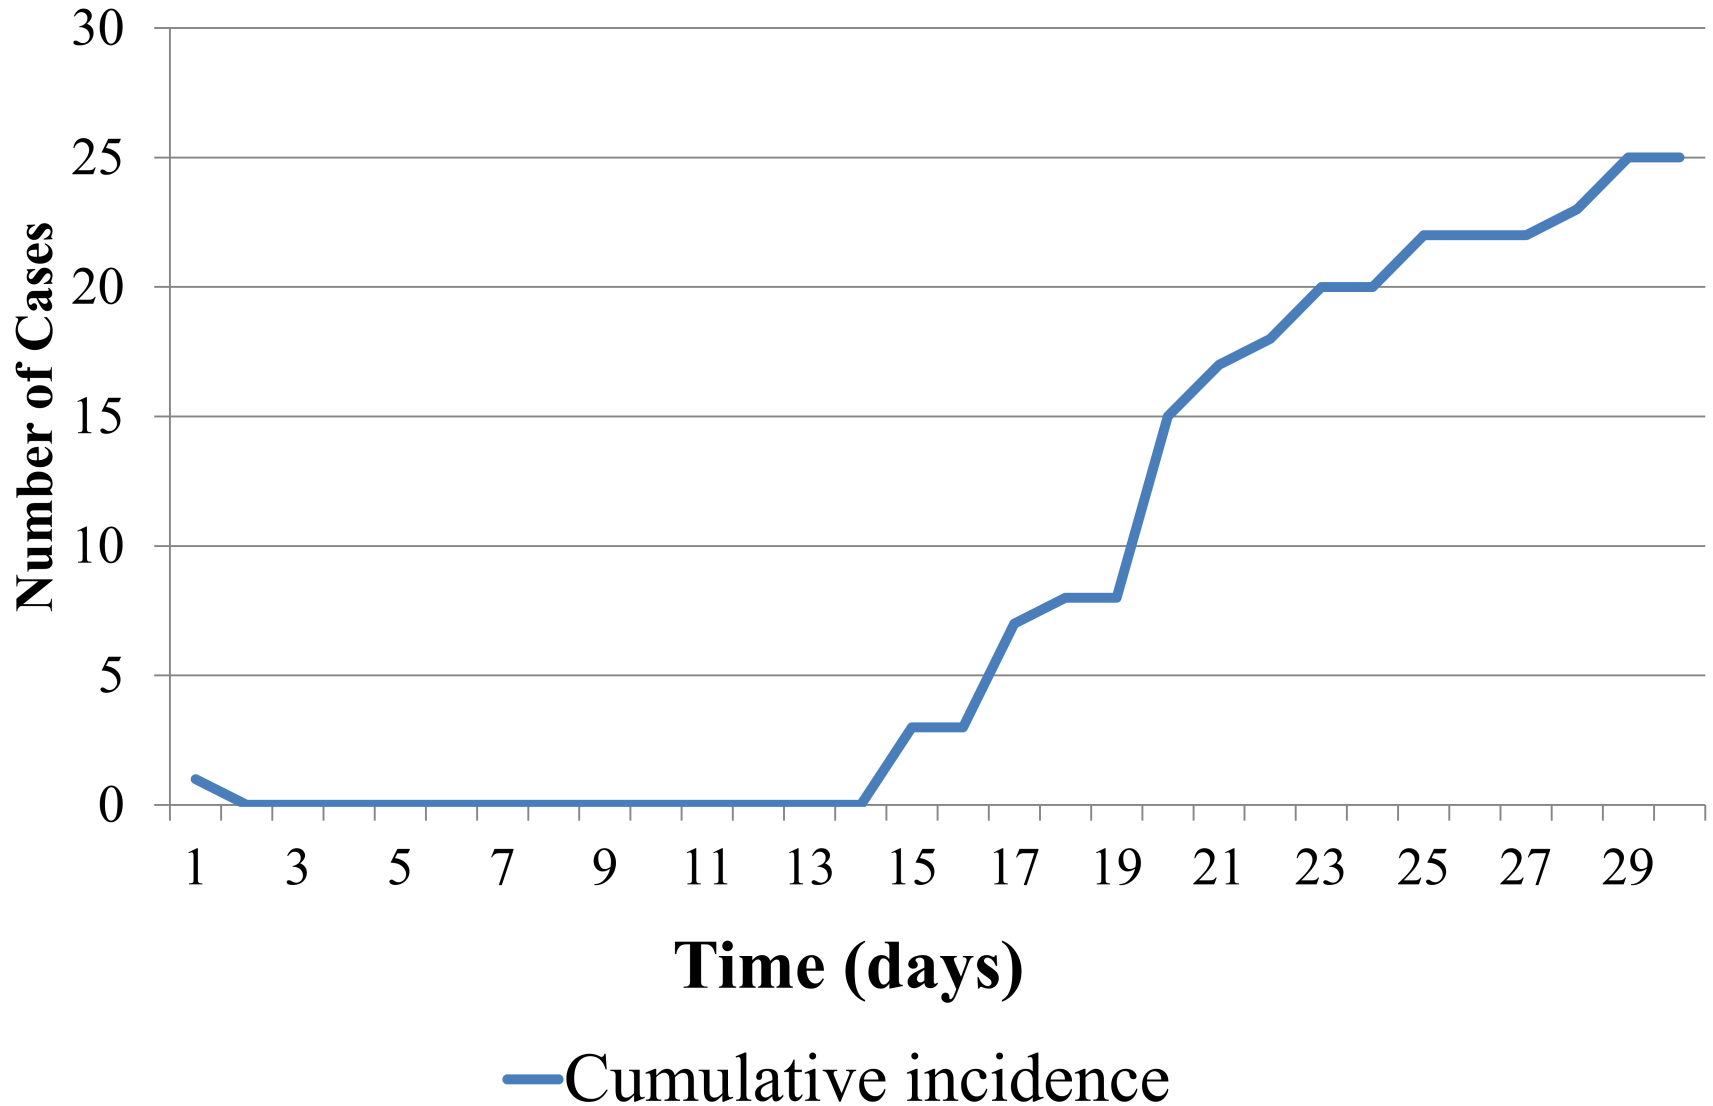

Supplement: NIHMS991921-supplement-Supp_FigS1.pdf [file NIHMS991921-supplement-Supp_FigS1.pdf]

# Outbreak Cumulative Incidence

**A**

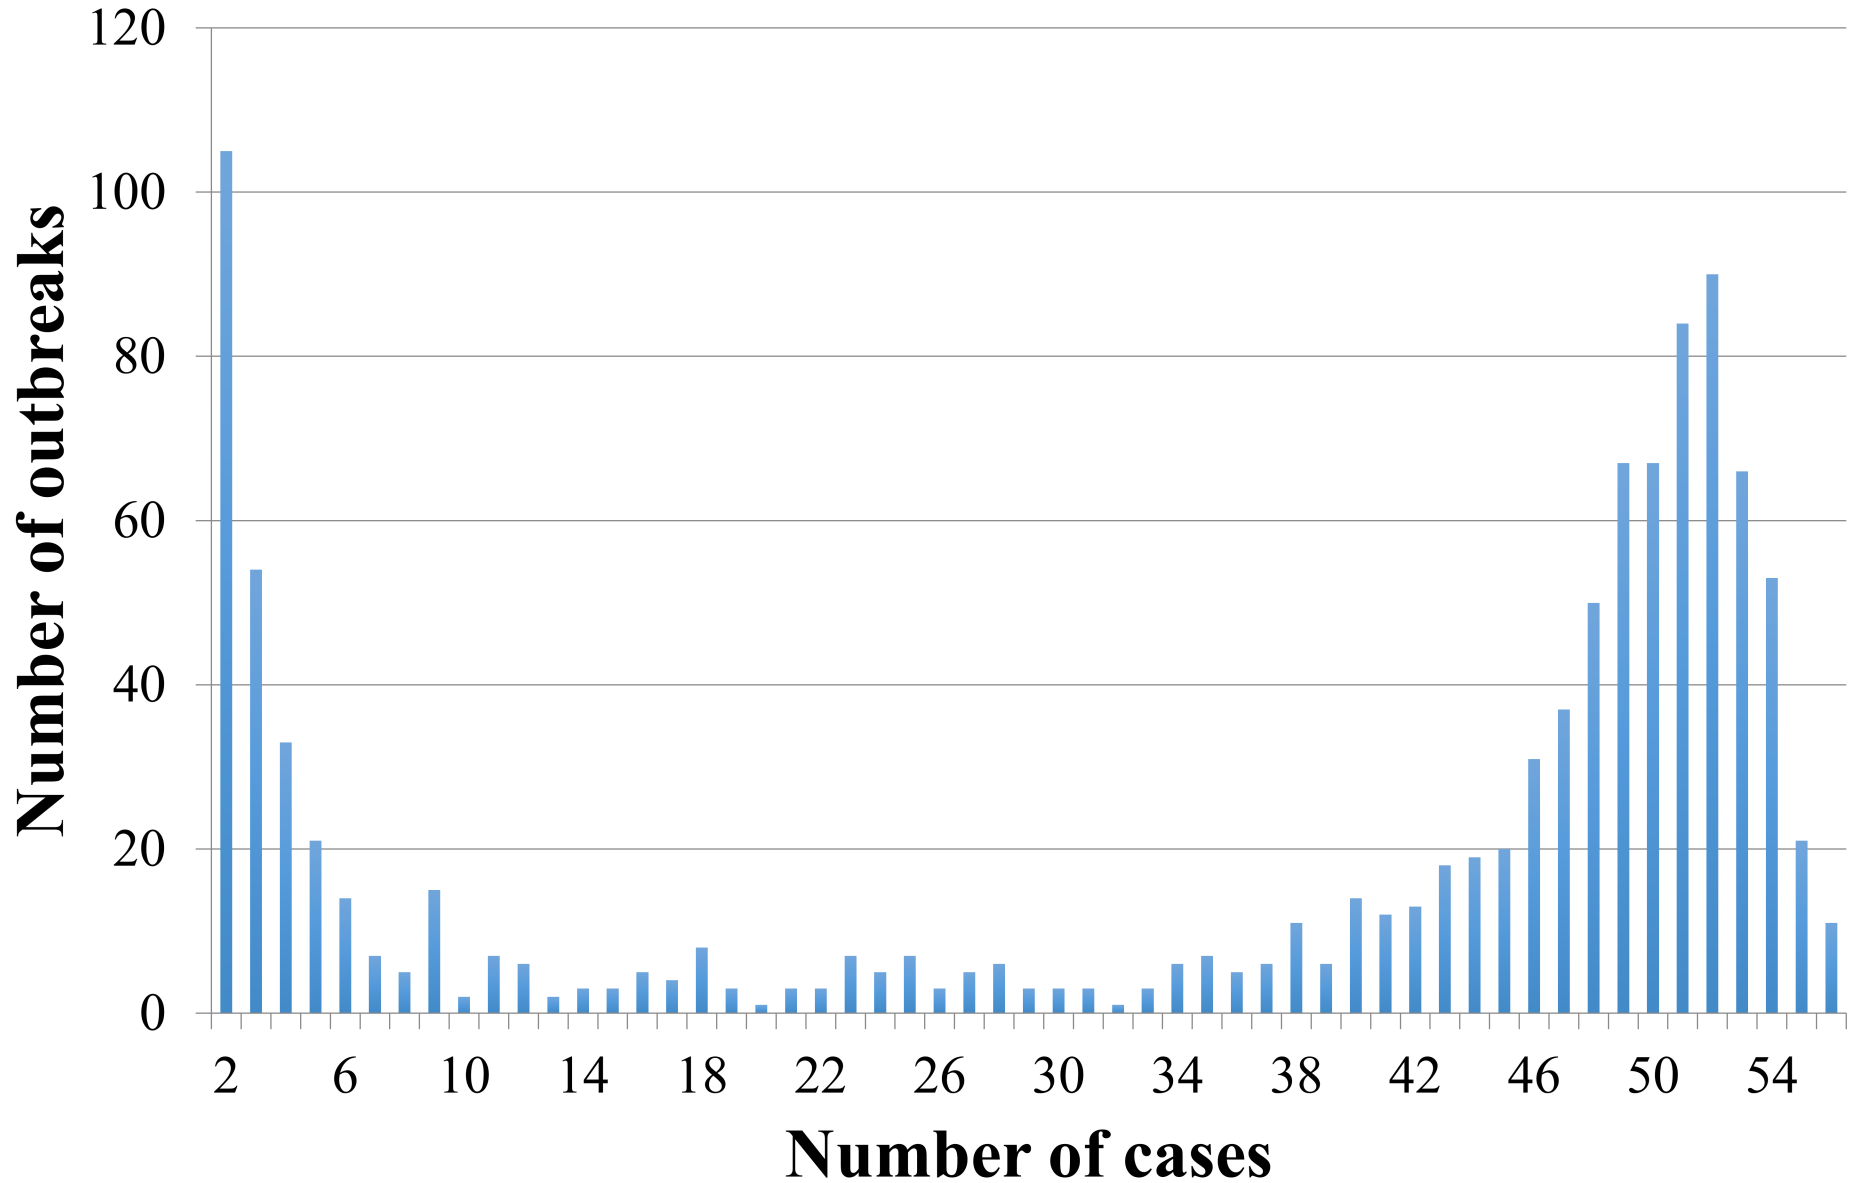

Supplement: NIHMS991921-supplement-Supp_FigS3.pdf [file NIHMS991921-supplement-Supp_FigS3.pdf]

# **B** Cumulative Observed Incidence

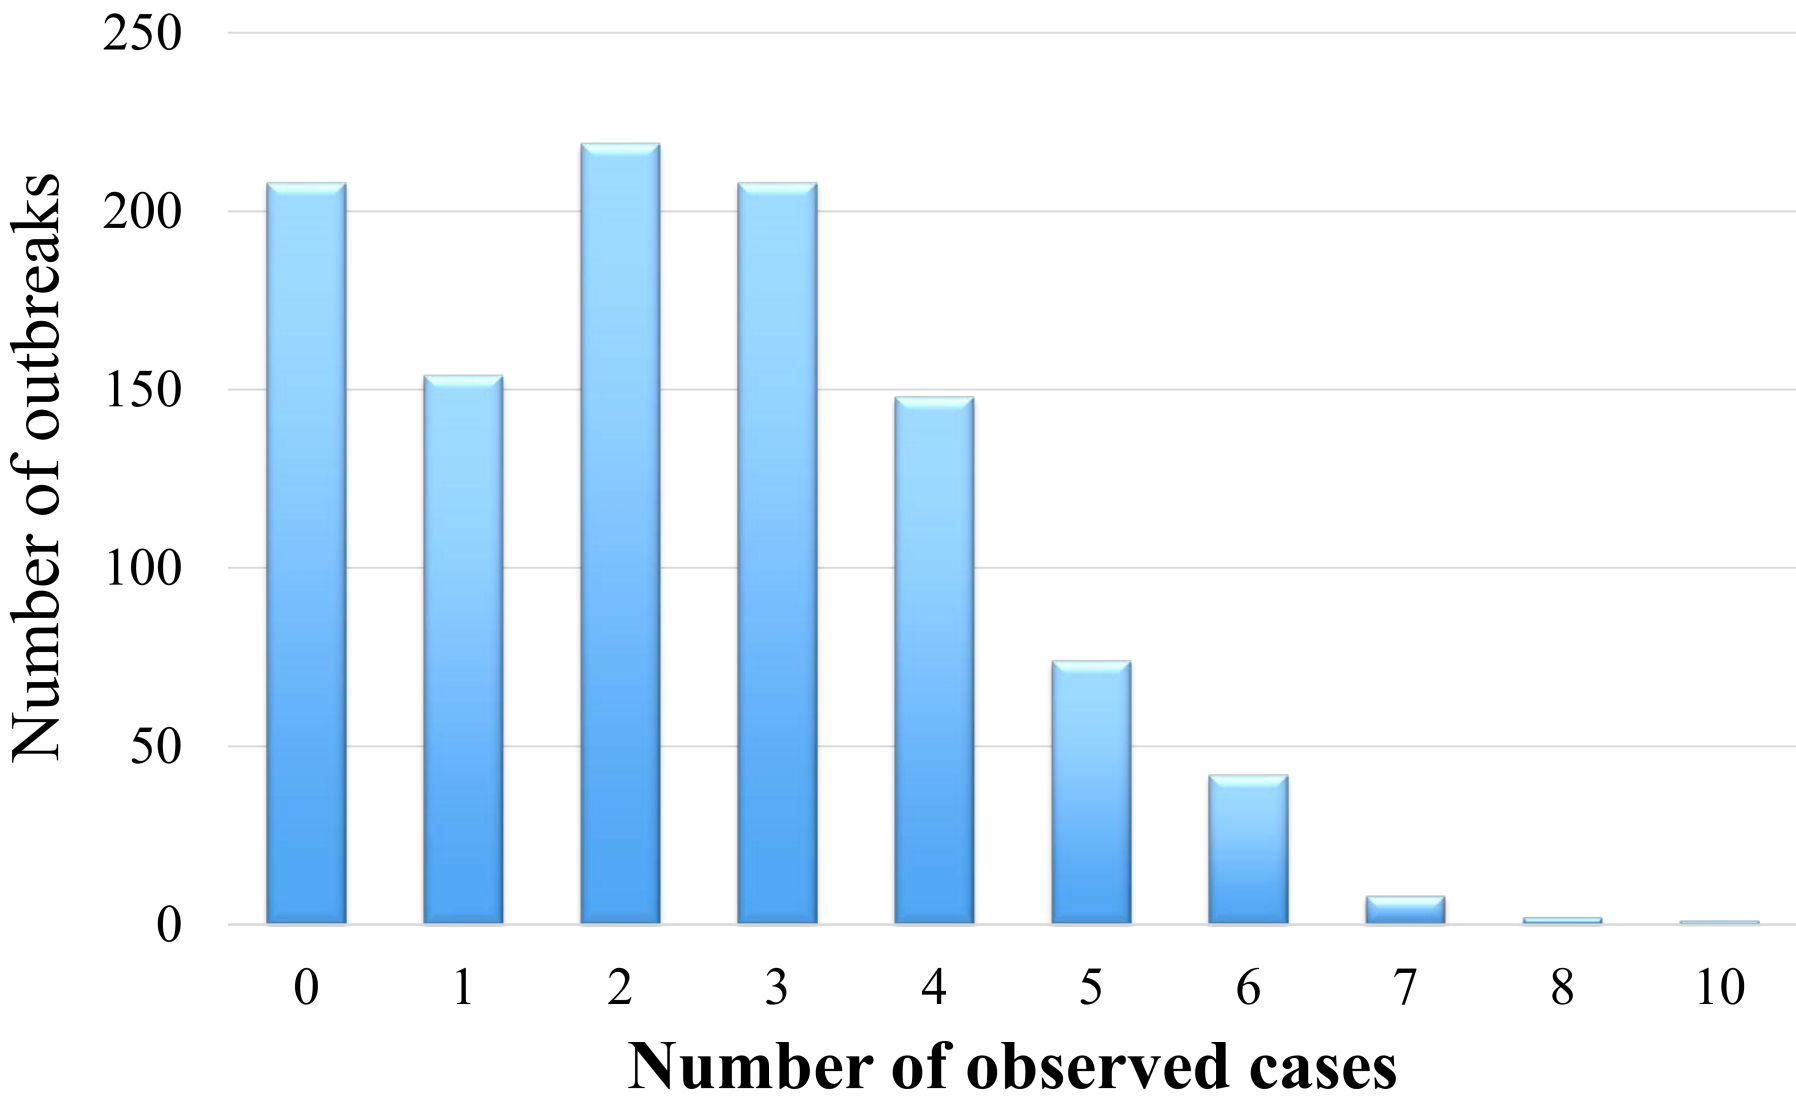

Supplement: NIHMS991921-supplement-Supp_FigS3b.pdf [file NIHMS991921-supplement-Supp_FigS3b.pdf]

# Distribution of Outbreak Duration

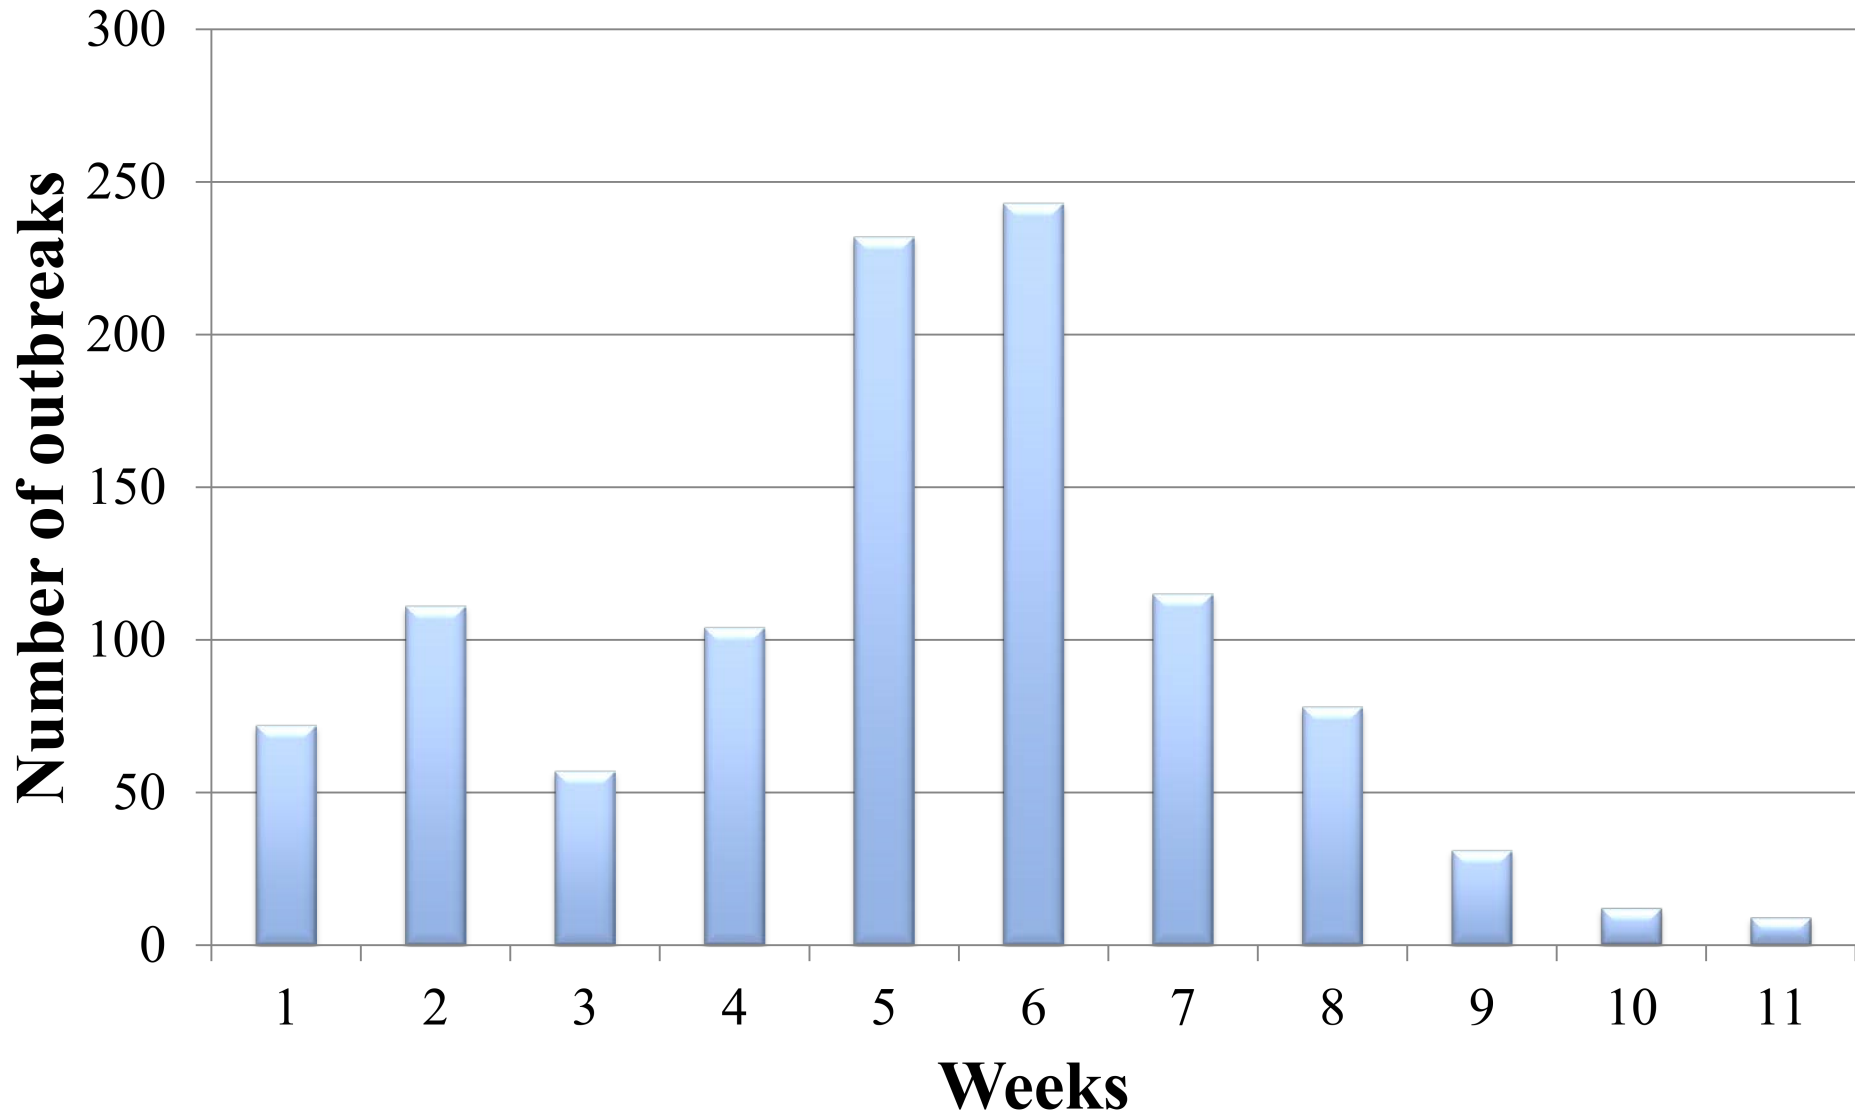

Supplement: NIHMS991921-supplement-Supp_figS2.pdf [file NIHMS991921-supplement-Supp_figS2.pdf]
